# Supplementary material
Source: Springer Nature journal article supplement (https://www.springermedizin.de/resource/supplementary/12887_2007_182_MOESM4_ESM.pdf/9477560)

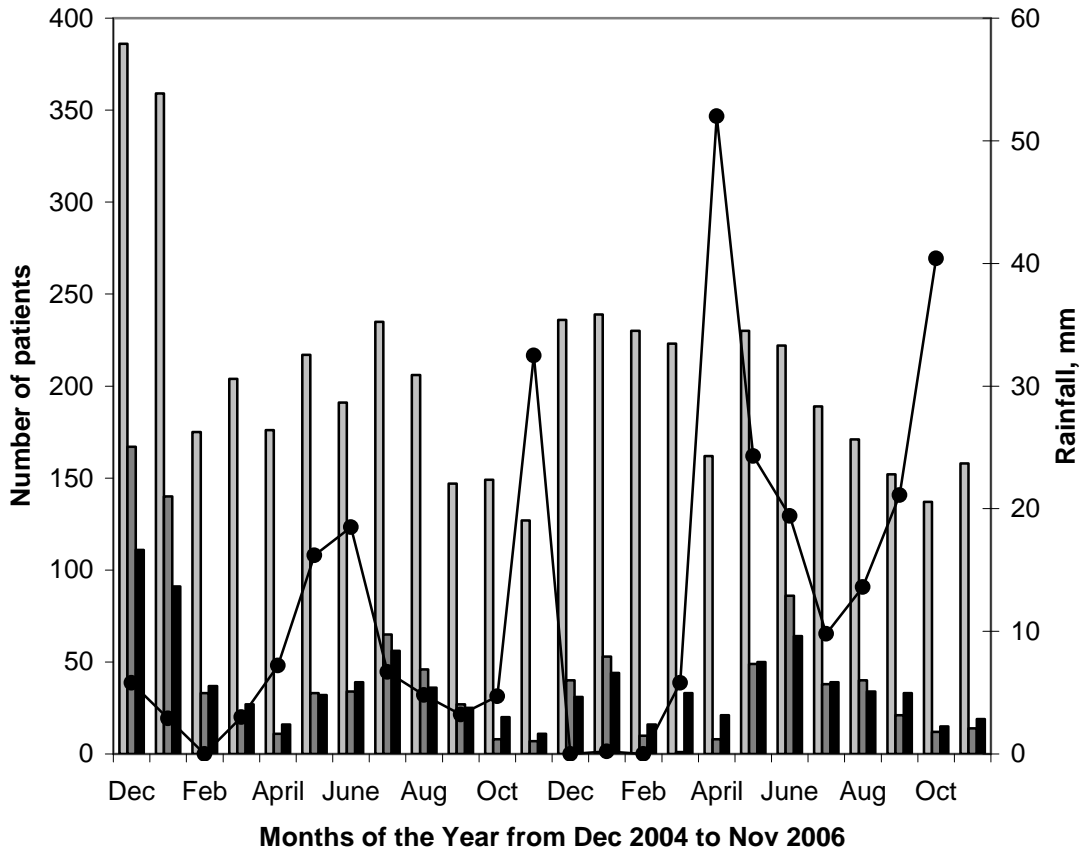

Total admissions
  no. with malaria
  No. with seizures
  Rainfall

Supplement: MOESM4 [file 9477560]
